# Supplementary material
Source: publisher figshare collection journal article supplement (https://acs.figshare.com/ndownloader/files/3897547)
Supplement: Supplementary file 1 [file 3897547]

*Supplementary Information*

Simultaneous Visualization of Graphene Grain Boundaries and Wrinkles with Structural Information by Gold Deposition

Seong Uk Yu,1,2,‡ Beomjin Park,3 ‡ Yeonchoo Cho,2, ‡ Seung Hyun,3 Jin Kon Kim,3,* and Kwang S. Kim1,*

1Department of Chemistry, Ulsan National Institute of Science and Technology (UNIST), Ulsan 689-798, Korea, 2Department of Chemistry and 3Department of Chemical Engineering, Pohang University of Science and Technology, Pohang 790-784, Korea.

+These authors contributed equally to this work.

*Correspondence should be addressed to K.S.K. (email: [kimks@unist.ac.kr](mailto:kimks@unist.ac.kr)) and J.K.K (email: jkkim@postech.ac.kr)

Supplementary information includes figure from Figure S1 to Figure S5.


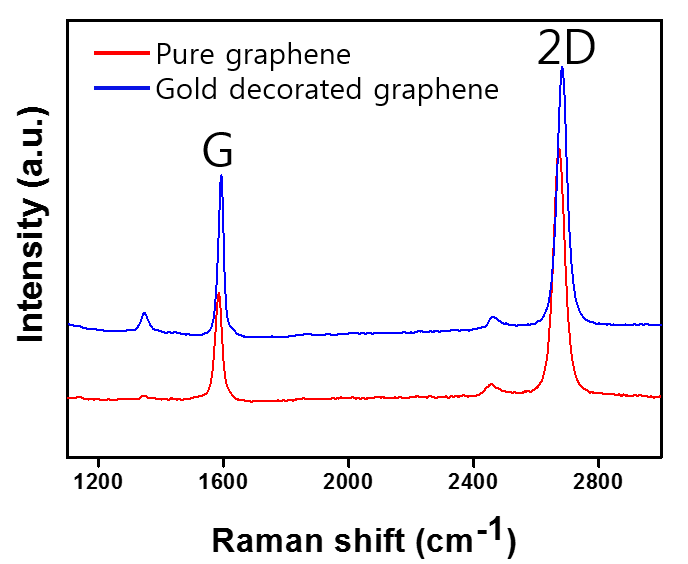


Figure S1. The G band and 2D band of graphene were obtained by the Raman spectroscopy at 1584 cm-1 and 2671 cm-1, respectively. The intensity ratio of 2D to G proves that the single-layer graphene was used in this work. After gold deposition, the G band and the 2D band of graphene show the blue shifts to 1588 cm-1 and 2677 cm-1, respectively.


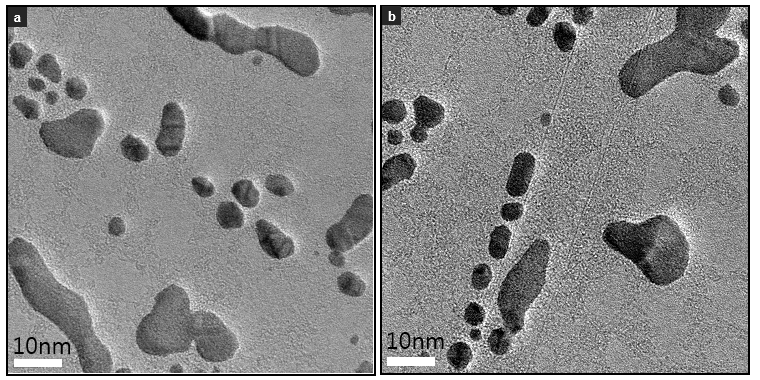


Figure S2. High resolution TEM images represent gold decorated graphene near stitched GB (a), and overlapped GB (b). Two edges can be clearly seen in the case of overlapped GB since the upper layer graphene is almost transparent. However, the line of the stitched GB can only be inferred from the morphology of gold NPs since two grains are stitched, leaving no edge.


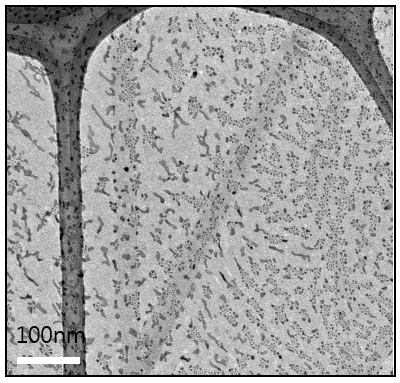


Figure S3. TEM image represents gold-decorated graphene near the folded wrinkles. Due to stacking of multiple graphene layers, the wrinkle are seen darker.


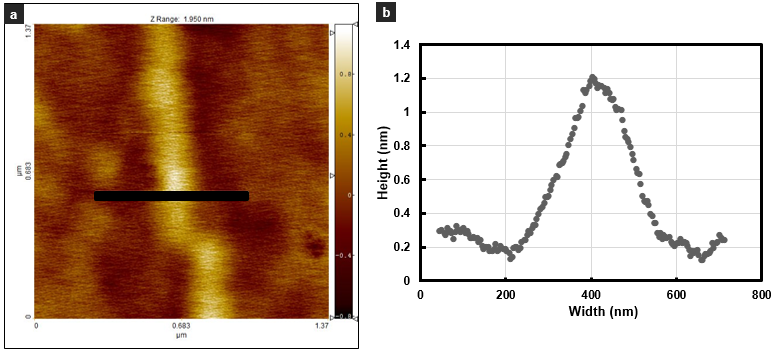


Figure S4. The AFM topography of the folded wrinkle is shown in (a), and the line profile of the black line in (a) is demonstrated in (b). The height is 1nm, and the width is approximately 150 nm. The width is below the lateral resolution of our AFM.


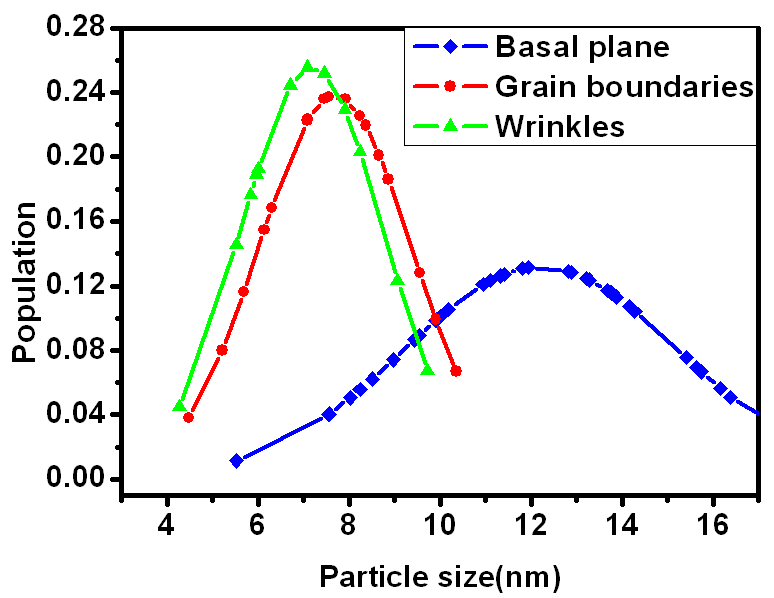


Figure S5. Size distributions of gold NPs; green, red, and blue lines indicate the size of gold NPs near wrinkles, grain boundaries, and basal plane of graphene, respectively.


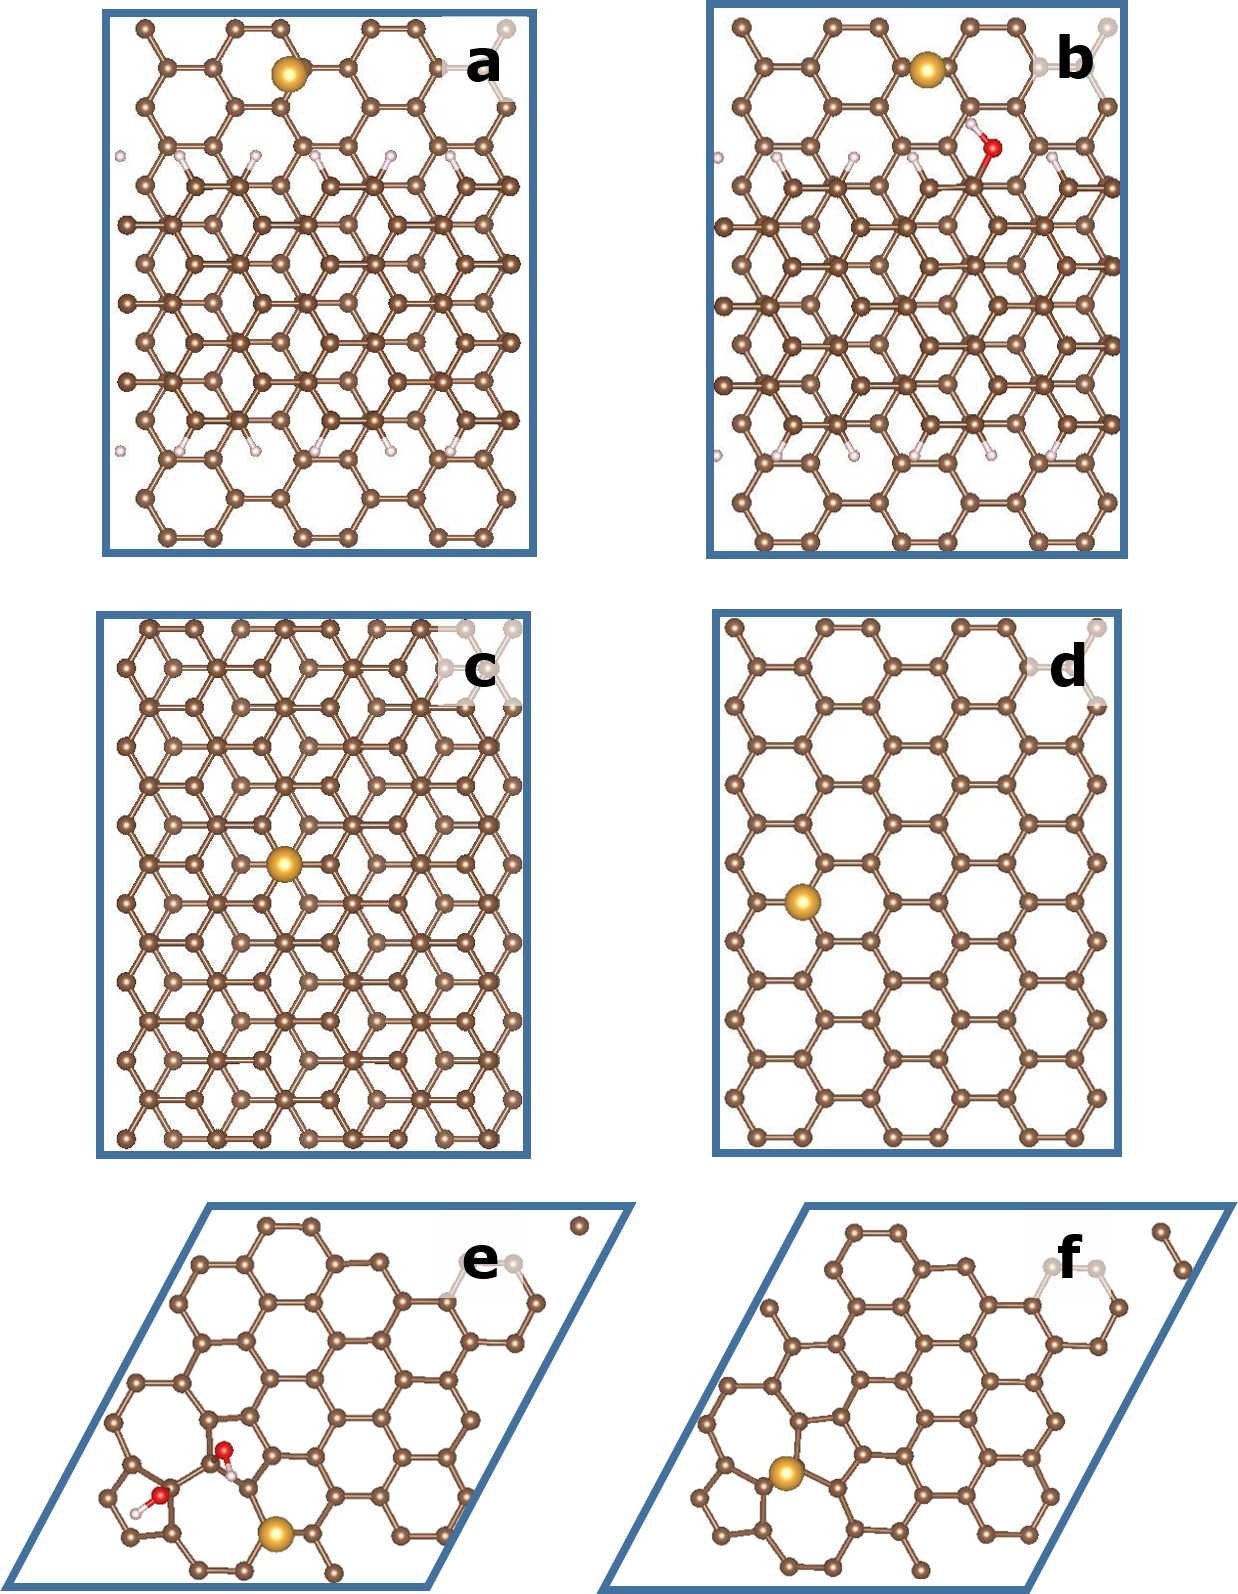


Figure S6. Selected geometries of graphene-related structure and a gold adatom after relaxation. Each geometry represents (a) overlapped grain boundary, (b) functionalized overlapped grain boundary, (c) graphene bilayer, (d) graphene, (e) functionalized Stone-Wales defect, (f) Stone-Wales defect, respectively. Blue lines denote periodic boundaries. White, brown, red, and orange balls express hydrogen, carbon, oxygen, and gold, respectively.
